# Supplementary material
Source: ML conference proceedings conference paper supplement (https://openaccess.thecvf.com/content/ICCV2025/html/Mallis_CAD-Assistant_Tool-Augmented_VLLMs_ICCV_2025_paper.html)
Supplement: Supplementary file 1 [file Mallis_CAD-Assistant_Tool-Augmented_VLLMs_ICCV_2025_supplemental.pdf]

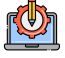

# CAD-Assistant: Tool-Augmented VLLMs as Generic CAD Task Solvers

## Supplementary Material

This supplementary material includes various details that were not reported in the main paper due to space constraints. To demonstrate the benefit of the proposed CAD-Assistant, we also expand our qualitative evaluation.

### 7. CAD-specific Tool-set

This section provides a detailed discussion of the CAD-specific tool set utilised by the proposed framework. CAD-ASSISTANT is equipped with the following tools:

**Hand-drawn Image Parameterizer:** To enable visual sketching, we employ a task-specific model for hand-drawn image parameterization [21]. This module extracts parameters and constraints as text, allowing CAD-Assistant to reuse primitive parameters for CAD code generation.

**CAD Sketch Recognizer:** We equip CAD-Assistant with a CAD sketch recognition utility. This routine returns both a summary of geometries and parametric constraints in .json format, along with a visual rendering of the CAD sketch. The rendered sketch image includes numeric markers of the primitive ID overlayed on the rendered geometries. Motivated by [64], this approach enhances visual grounding for GPT-4o, *i.e.* its ability to associate visual content with the textual description of primitives.

**3D Solid Recognizer:** For CAD model recognition, we also incorporate a 3D solid recognizer that generates a .json summary of model parameters (for both sketch and extrusion operations) along with visual renderings of the 3D solid from four different angles, providing a multimodal representation of structure and geometry.

**Constraint Checker:** We include a dedicated function that evaluates the parameters of a parametric constraint to determine its validity and whether it causes movement in geometric elements. The constraint analyzer facilitates effective interaction with the CAD solver by assessing the impact of commands like parametric constraints on geometry.

**Cross-section Extract:** Cross-sections are critical components of CAD reverse engineering workflows [6]. CAD-Assistant includes a specialized routine for 2D cross-section images from 3D scans across 2D planes.

**FreeCAD API:** CAD-Assistant is integrated with the open-source FreeCAD software [11] via the FreeCAD Python API. This API enables programmatic control over the majority of commands available to designers and access to the current state of the CAD design. In this work, we consider a range of components from the Sketcher

and Part modules of the FreeCAD API, focusing on CAD sketching, the addition and manipulation of primitives, geometric constraints, and extrusion operations for constructing 3D solids. A summary of the exact classes, methods and class attributes of the FreeCAD API integrated with CAD-Assistant is provided in the supplementary.

**Python:** Beyond facilitating actions  $a_t$ , the planner can utilize Python as a tool to conduct essential logical and mathematical operations, such as calculating segment lengths, determining angles, and deriving parameter values.

### 8. System Details

CAD-Assistant’s implementation is based on the Autogen [57] programming framework for Agentic AI. We report CAD-Assistant’s performance with gpt-4o-mini-2024-07-18, gpt-4-turbo-2024-04-09 and gpt-4o-2024-08-06 as VLLM planners, accessed via API calls.

### 9. CAD Representations

In this section, we provide a formally introduction of 2D CAD sketches and 3D CAD models.

#### 9.1. Constrained CAD Sketches

A constraint CAD sketch is commonly represented by a graph  $\mathcal{G} = (\mathcal{P}^n, \mathcal{C}^m)$  comprising a set of  $n$  primitive nodes  $\{\mathbf{p}_1, \mathbf{p}_2, \dots, \mathbf{p}_n\} \in \mathcal{P}^n$  and  $m$  edges between nodes  $\{\mathbf{c}_1, \mathbf{c}_2, \dots, \mathbf{c}_m\} \in \mathcal{C}^m$  denoting geometric constraints. Primitives  $\mathbf{p}_i$  are of type line  $\mathbf{l}_i$ , arc  $\mathbf{a}_i$ , circle  $\mathbf{c}_i$  or points  $\mathbf{d}_i$ . VLLM and LLM planners can be sensitive to the parameterization strategy followed for representing  $\mathbf{p}_i$ . This work conducts an investigation on the impact of sketch parameterization on visual program understanding in black-box VLLMs presented in section 4.1 where we compare the following parameterization strategies:

**Implicit:** This is the parameterization strategy utilized for representation of 2D CAD sketches by the SGPBench [45]. Primitives  $\mathbf{p}_i$  are represented as follows:

$$\begin{aligned} \mathbf{a}_i &= (x_c, y_c, v_x, v_y, b_{wc}, \theta_s, \theta_e) \in \mathbb{R}^4 \times \{0, 1\} \times [0, 2\pi]^2 \\ \mathbf{c}_i &= (x_c, y_c, r) \in \mathbb{R}^3 \\ \mathbf{l}_i &= (x_p, y_p, v_x, v_y, d_s, d_e) \in \mathbb{R}^6 \\ \mathbf{d}_i &= (x_p, y_p) \in \mathbb{R}^2 \end{aligned}$$

Table 7. Implicit parameterization strategy for arcs  $\mathbf{a}_i$ , circles  $\mathbf{c}_i$ , lines  $\mathbf{l}_i$  and points  $\mathbf{p}_i$ .

where  $(x_c, y_c)$  denotes center point coordinates,  $(d_s, d_e)$  are signed start/end point distances to a point  $(x_p, y_p)$ , the unit direction vector is denoted as  $(v_x, v_y)$ , radius is denoted with  $r$ ,

$(\theta_s, \theta_e)$  are the start/end angles to the unit direction vector in radians and  $b_{wc}$  is a binary flag indicating if the arc is clockwise.

**Point-based:** We contrast the implicit parameterization to the point-based approach from [21, 22, 49] as described on the following table.

|                                                                  |
|------------------------------------------------------------------|
| $\mathbf{a}_i = (x_s, y_s, x_m, y_m, x_e, y_e) \in \mathbb{R}^6$ |
| $\mathbf{c}_i = (x_c, y_c, r) \in \mathbb{R}^3$                  |
| $\mathbf{l}_i = (x_s, y_s, x_e, y_e) \in \mathbb{R}^4$           |
| $\mathbf{d}_i = (x_p, y_p) \in \mathbb{R}^2$                     |

Table 8. Point-based parameterization strategy for arcs  $\mathbf{a}_i$ , circles  $\mathbf{c}_i$ , lines  $\mathbf{l}_i$  and points  $\mathbf{p}_i$ .

where  $(x_s, y_s)$ ,  $(x_m, y_m)$ ,  $(x_e, y_e)$  are start, middle and end point coordinates and  $r$  is the radius.

**Overparameterized:** This strategy is a simple combination of the implicit and point-based parameterization.

|                                                                                                                                                        |
|--------------------------------------------------------------------------------------------------------------------------------------------------------|
| $\mathbf{a}_i = (x_c, y_c, v_x, v_y, x_s, y_s, x_m, y_m, x_e, y_e, b_{wc}, \theta_s, \theta_e) \in \mathbb{R}^{10} \times \{0, 1\} \times [0, 2\pi)^2$ |
| $\mathbf{c}_i = (x_c, y_c, r) \in \mathbb{R}^3$                                                                                                        |
| $\mathbf{l}_i = (x_p, y_p, v_x, v_y, d_s, d_e, x_s, y_s, x_e, y_e) \in \mathbb{R}^{10}$                                                                |
| $\mathbf{d}_i = (x_p, y_p) \in \mathbb{R}^2$                                                                                                           |

Table 9. Overparameterized parameterization strategy for arcs  $\mathbf{a}_i$ , circles  $\mathbf{c}_i$ , lines  $\mathbf{l}_i$  and points  $\mathbf{p}_i$ .

We identify the overparameterized strategy as the safest approach, as it enables the VLLM planner to leverage a broader and more diverse set of parameters, better accommodating the varying requirements of different input queries. In addition to parametric primitives  $\mathbf{p}_i$ , a CAD sketch incorporates constraints defined by CAD designers, ensuring that future modifications propagate coherently throughout the design. A constraint is defined as an undirected between primitives  $\mathbf{p}_i$  and  $\mathbf{p}_j$ . They might also include subreferences  $(s_i, s_j) \in [1..4]^2$ , to specify whether the constraint is applied on *start*, *end*, *middle* point, or *entire* primitive for both  $\mathbf{p}_i$  and  $\mathbf{p}_j$ . Note that some constraints may involve only a single primitive  $\mathbf{p}_i$  (e.g. a vertical line); in such cases, the constraint is defined as the edge between the primitive and itself. In this work we consider the following types of constraints: *coincident*, *parallel*, *equal*, *vertical*, *horizontal*, *perpendicular*, *tangent*.

## 9.2. CAD Models

Following the feature-based CAD modeling paradigm [37, 61], a CAD model  $\mathbf{C} \in \mathcal{C}$  is constructed as a sequence of design steps. In this work, evaluation is performed on CAD models from the 3D partition of SGPBench [45] sourced from the DeepCAD dataset [61]. These models are constructed exclusively via a *sketch-extrude* strategy, where 2D CAD sketches  $\mathcal{G}_i$  are followed by extrusion operations that turns the sketch into a 3D volume. Extrusions include the following parameters:

| Parameter Description    | Parameter Notation                                       |
|--------------------------|----------------------------------------------------------|
| Sketch plane orientation | $(\theta, \phi, \gamma) \in [0, \pi] \times [0, 2\pi)^2$ |
| Sketch plane translation | $(\tau_x, \tau_y, \tau_z) \in \mathbb{R}^3$              |
| sketch scale             | $\sigma \in \mathbb{R}$                                  |
| Extrusion distance       | $(d_-, d_+) \in \mathbb{R}^2$                            |
| Extrusion type           | $\beta \in \{1, 2, 3, 4\}$                               |

Table 10. Extrusion Parameters description.

where extrusion type  $\beta$  can be among *new*, *cut*, *join* and *intersect*.

## 9.3. Parameter Quantization

Unlike prior task-specific models for CAD-related tasks such as hand-drawn sketch parameterization [21, 22, 49], CAD sketch generation [49], or 3D CAD model generation [61], the CAD-Assistant does not rely on the common practice of parameter quantization. Typically, these methods use a 6-bit uniform quantization scheme to convert continuous sketch and extrusion parameters into discrete tokens, enabling prediction through transformer-based sequence architectures trained with cross-entropy loss [21, 22, 49, 61]. In contrast, the CAD-Assistant employs a VLLM planner that directly regresses primitive and extrusion parameters as continuous numerical values. We apply the 6-bit uniform quantization to the outputs of CAD-Assistant, to facilitate direct comparisons with task-specific methods for auto-constraining and hand-drawn sketch parameterization reported on section 4.2 of the main paper.

**QUERY:** How many vertices does the CAD object have? **A) 4 B) 5 C) 6 D) 7**

**PLAN 1:** I will count the distinct start and end points of these line segments.

**ACTION 1**

```
# Extracting unique vertices from the sketch geometry
vertices = set()
for geometry in geometries:
    vertices.add((geometry["StartPoint"]["x"], geometry["StartPoint"]["y"]))
    vertices.add((geometry["EndPoint"]["x"], geometry["EndPoint"]["y"]))
print(f"Number of unique vertices: {len(vertices)}")
```

**ENVIRONMENT:** Execution Success. Number of unique vertices: **11**

**PLAN 2:** The calculation of unique vertices seems **incorrect** as 11 is not one of the possible answers. I need to carefully examine the coordinates and ensure that similar points are not counted multiple times due to minor differences.

**ACTION 2**

```
vertices = [
    (-0.232, -0.1977), (-0.1855, -0.1977), (-0.1866, -0.1973), (-0.0122, -0.4994), (-0.011, -0.5),
    (0.2331, -0.5), (0.2331, 0.5), (-0.0459, 0.5), (-0.0459, 0.1233), (-0.0471, 0.125), (-0.2331, -0.1972)
]
# Using a consistent precision for rounding
unique_vertices = set()
for vertex in vertices:
    unique_vertices.add((round(vertex[0], 2), round(vertex[1], 2)))
print(f"Re-evaluated number of unique vertices: {len(unique_vertices)}")
```

**ENVIRONMENT:** Execution Success. Number of unique vertices: **7**

Figure 6. Correction of an inaccurate answer for a CQA example.

## 10. Verification of Responses

The proposed workflow allows for verifying incorrect responses. The generated plan can be updated based on intermediate code execution results, including error logs (see  $f_t$  in Eq. 4). Figure 6 shows that when an error occurs (i.e., answer 11 is not among the possible choices of the question), the planner detects this mistake and updates the plan accordingly. Exploring the potential of

combining tool-augmentation with more advanced planning and verification algorithms (e.g. [2]) is left as interesting future work.

## 11. Costs

The proposed CAD-Assistant utilizes a GPT-4o planner accessed through API calls. Table 11 provides a summary of the costs associated with each user query across CAD benchmarks.

## 12. CAD-Assistant Prompts

In this work, we use a unified prompt template, similar to [19] for all CAD-specific problems. The prompt consists of three key components: (1) a general context, (2) a list of tools provided to the VLLM planner via docstrings, and (3) a multimodal user request. A summary of the FreeCAD API commands is provided in Table 12, and the full set of docstrings supplied to the planner is presented in Section 15. Note that as the set of considered API commands increases, the input context of the VLLM planner could increase. To address this, a preprocessing step could be implemented to dynamically select relevant docstrings before execution. The general context available to the VLLM planner is shown in Figure 8.

## 13. Beyond Simplified CAD Commands

Extending the discussion of Sec. 4.4, we provide an additional qualitative example of the proposed CAD-Assistant. Figure 7 shows the utilization of the CAD operation *Fillet* by our method. It can be observed that CAD-Assistant computes the intersection of the lines to be able to perform the *Fillet* operation on the corners by analyzing its docstring. Moreover, we find that VLLM planner performance might vary across CAD commands. This highlights the necessity of developing CAD-specific benchmarks tailored to CAD agents. Such benchmarks are crucial for gaining deeper insights into the capabilities and limitations of VLLM planners on generic CAD task solving.

## 14. Qualitative Evaluation

This supplementary material presents examples of complete agent trajectories for the CAD benchmarks used in this study. Detailed examples from the 2D and 3D subsets of SGPBench are provided in subsections 14.1 and 14.2. Trajectories for the autoconstraining task are illustrated in subsection 14.3, while examples of hand-drawn parameterization are presented in subsection 14.4.

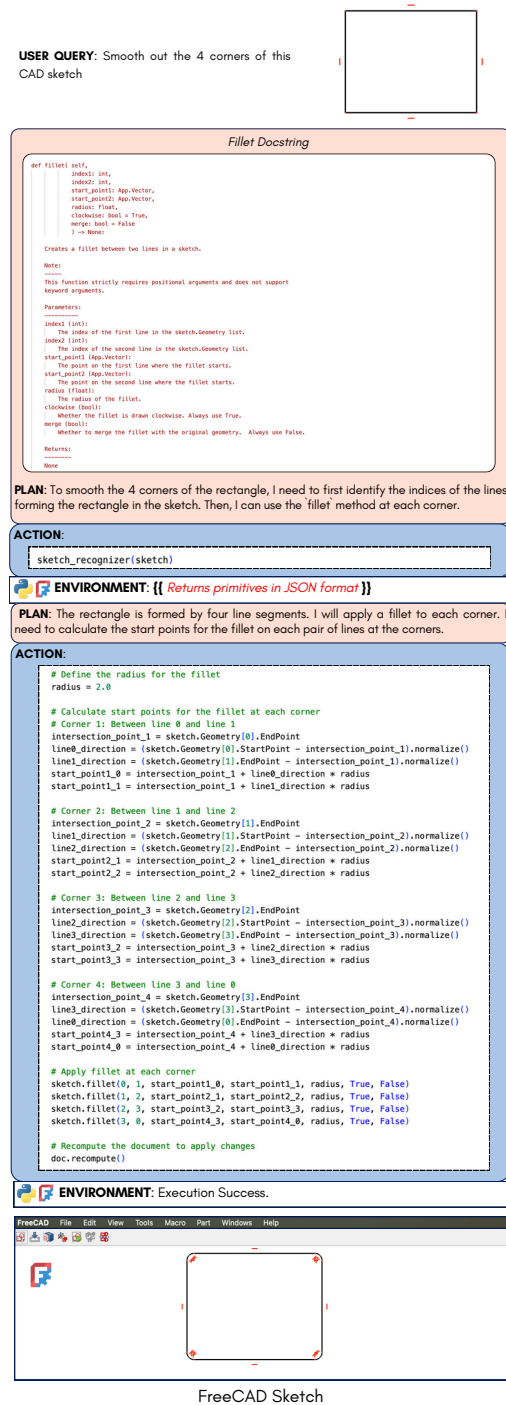

Figure 7. Example of the proposed CAD-Assistant utilizing the *Fillet* CAD command.

| Task                              | Avg Input Tokens | Avg Output Tokens | Avg Cost per User Request |
|-----------------------------------|------------------|-------------------|---------------------------|
| CAD Question Answering            | 11280            | 178               | \$0.0299                  |
| Autoconstraining                  | 28422            | 852               | \$0.0795                  |
| Handdrawn sketch parameterization | 31170            | 1081              | \$0.0887                  |

Table 11. Cost per user request for the CAD-Assistant utilizing GPT-4o as VLLM planner.

| FreeCAD Class        | Class Methods                                                                                                                                                     | Class Attributes                                                                                                                                                                                                              |
|----------------------|-------------------------------------------------------------------------------------------------------------------------------------------------------------------|-------------------------------------------------------------------------------------------------------------------------------------------------------------------------------------------------------------------------------|
| Sketcher.Sketch      | <code>__init__()</code> , <code>recompute()</code> , <code>delGeometries(indx)</code> ,<br><code>addConstraint(const)</code> , <code>addGeometry(geometry)</code> | <code>Name</code> , <code>Geometry</code> , <code>Constraints</code> , <code>State</code> ,<br><code>ConstraintCount</code> , <code>GeometryCount</code> ,<br><code>Placement</code>                                          |
| Sketcher.Constraints | <code>__init__(constraintType, *args)</code>                                                                                                                      | <code>Name</code>                                                                                                                                                                                                             |
| Part.Circle          | <code>__init__(center, normal, radius)</code>                                                                                                                     | <code>Center</code> , <code>Radius</code>                                                                                                                                                                                     |
| Part.Point           | <code>__init__(point)</code>                                                                                                                                      | <code>X</code> , <code>Y</code> , <code>Z</code>                                                                                                                                                                              |
| Part.ArcOfCircle     | <code>__init__(circle, startParam, endParam)</code> ,<br><code>__init__(startPoint, endPoint, midPoint)</code>                                                    | <code>Center</code> , <code>Radius</code> , <code>StartPoint</code> , <code>EndPoint</code> ,<br><code>FirstParameter</code> , <code>LastParameter</code>                                                                     |
| Part.LineSegment     | <code>__init__(startPoint, endPoint)</code>                                                                                                                       | <code>StartPoint</code> , <code>EndPoint</code>                                                                                                                                                                               |
| Part.Extrude         | <code>__init__()</code>                                                                                                                                           | <code>Base</code> , <code>DirMode</code> , <code>LengthFwd</code> , <code>LengthRev</code> ,<br><code>Solid</code> , <code>Reversed</code> , <code>Symmetric</code> ,<br><code>TaperAngle</code> , <code>TaperAngleRev</code> |
| Part.Solid           | <code>fuse(shape)</code> , <code>cut(shape)</code> , <code>common(shape)</code>                                                                                   | <code>TypeId</code> , <code>Volume</code> , <code>BoundingBox</code>                                                                                                                                                          |

Table 12. Summary of FreeCAD API classes, methods, and attributes utilized by the CAD-Assistant framework. The VLLM planner is supplied with docstrings that clarify their use, including detailed descriptions, function signatures and usage examples.

**Prompt Template:**

You are a helpful multimodal Computer Aided Design (CAD) AI assistant.

Solve tasks using your vision, coding, and language skills.

The task can be free-form or multiple-choice questions.

You can answer the user's question. If you are not sure, you can code.

You are coding in a Python jupyter notebook environment. The environment has also access to the PYTHON FREECAD API.

You can suggest python code (in a python coding block) for the user to execute. In a dialogue, all your codes are executed with the same jupyter kernel, so you can use the variables, working states in your earlier code blocks.

Solve the task step by step if you need to.

The task may require several steps. Give your code to the user to execute. The user may reply with the text and image outputs of the code execution. You can use the outputs to proceed to the next step, with reasoning, planning, or further coding.

When using code, you must indicate the script type in the code block. The user cannot provide any other feedback or perform any other action beyond executing the code you suggest. The user can't modify your code. So do not suggest incomplete code which requires users to modify. Don't use a code block if it's not intended to be executed by the user.

Don't include multiple code blocks in one response. Do not ask users to copy and paste the result. Instead, use 'print' function for the output when relevant. Check the execution result returned by the user.

For each turn, you should first do a "PLAN", based on the images and text you see.

Here are the commands that you can use. Call them as described by the following docstrings

<DOCSTRINGS>

The jupyter notebook has already executed the following code to import the necessary packages:

```
import sys
from PIL import Image
from tools import *
import math
import copy
import numpy as np
import FreeCAD as App
import Part, Sketcher
from enum import Enum

img = Image.open('handdrawn_image.png')
```

# REQUIREMENTS #:

1. The generated actions can resolve the given user request # USER REQUEST # perfectly. The user request is reasonable and can be solved. Try your best to solve the request.
2. The arguments of a tool must be the same number, modality, and format specified in # DOCSTRINGS #;
3. If you think you got the answer, use ANSWER: <your answer> to provide the answer, and ends with TERMINATE.
4. All images should be stored in PIL Image objects. The user will send generated image outputs to you.
5. Only the FreeCAD commands that are provided to you. Do not used different commands or import new modules, as they will not be accessible.
6. Use as few tools as possible. Only use the tools for the use cases written in the tool description. You can use multiple tools in a single action.
7. You must return an answer with the choice letter if the user request is a multiple-choice question.

USER REQUEST # <REQUEST HERE>

Now please generate only PLAN and ACTION in RESULT. If no action needed, also reply with you answer and ends with TERMINATE in the RESULT:#

Figure 8. Prompt template for the CAD-Assistant. A detailed docstring disambiguating the use of the FreeCAD API and CAD-specific tools is provided as part of the prompt. The docstring is shown in section 15. On this example, the VLLM planner has a handdrawn sketch image preloaded. For different usecases, loading can be 3D scans or FreeCAD project files.

## 14.1. More qualitative results on CAD question answering for the 2D Subset of SGPBench.

**USER QUERY:** You are given a FreeCAD project file that includes a 2D CAD sketch. The FreeCAD project is already loaded for you.  
**Question:** What is the position of the smallest rectangle relative to the targets rectangle?  
 A) Above B) Below  
 C) left D) right

**PLAN:** To determine the position of the smallest rectangle relative to the largest rectangle in the sketch, I need to analyze the sketch. I will use the `sketch_recognizer` function to get a JSON representation of the sketch's geometries and constraints, as well as a rendered image of the sketch. This will help me identify the rectangles and their relative positions.

**ACTION:**

```
# Use the sketch_recognizer function to analyze the current state of the sketch
sketch_recognizer(sketch)
```

**ENVIRONMENT:** Execution Success

Rendered Sketch Image

Returns primitive parameters in JSON format here.

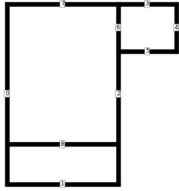

**PLAN:** The JSON data and the rendered image show two rectangles. The largest rectangle is defined by the lines with IDs 0, 1, 2, and 7. The smallest rectangle is defined by the lines with IDs 3, 4, 5, and 6. The smallest rectangle is positioned to the right of the largest rectangle.

ANSWER: D, **TERMINATE**.

**USER QUERY:** You are given a FreeCAD project file that includes a 2D CAD sketch. The FreeCAD project is already loaded for you.  
**Question:** How many right angles are present in the CAD object?  
 A) Two B) Four  
 C) Six D) Eight

**PLAN:** To determine the number of right angles in the CAD object, I need to analyze the sketch. I will use the `sketch_recognizer` function to obtain a JSON representation of the sketch's geometries and constraints, as well as a rendered image of the sketch. This will help me identify the number of right angles present in the object.

**ACTION:**

```
# Use the sketch_recognizer function to analyze the current state of the sketch
sketch_recognizer(sketch)
```

**ENVIRONMENT:** Execution Success

Rendered Sketch Image

Returns primitive parameters in JSON format here.

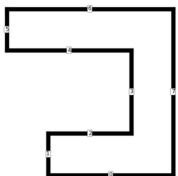

**PLAN:** The sketch consists of a series of connected line segments forming a shape. To determine the number of right angles, I need to examine the connections between these line segments. Each connection between two perpendicular lines forms a right angle.

From the JSON data and the rendered image, I can identify the following right angles:

- Between line segments 0 and 1
  - Between line segments 1 and 2
  - Between line segments 2 and 3
  - Between line segments 3 and 4
  - Between line segments 4 and 5
  - Between line segments 5 and 6
  - Between line segments 6 and 7
  - Between line segments 7 and 0
- There are eight right angles in total.

ANSWER: D, **TERMINATE**.

**USER QUERY:** You are given a FreeCAD project file that includes a 2D CAD sketch. The FreeCAD project is already loaded for you.

**Question:** What type of triangle is shown in the image based on its side lengths?

- A) Equilateral B) Isosceles  
 C) Scalene D) Right

**PLAN:** To determine the type of triangle based on its side lengths, I need to examine the sketch and identify the lengths of its sides. I will use the `sketch_recognizer` function to analyze the sketch and obtain a JSON representation of its geometric elements, which will help me understand the side lengths of the triangle.

**ACTION:**

```
# Use the sketch_recognizer function to analyze the current state of the sketch
sketch_recognizer(sketch)
```

**ENVIRONMENT:** Execution Success

Rendered Sketch Image

Returns primitive parameters in JSON format here.

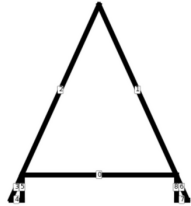

**PLAN:** The sketch shows a triangle with three main line segments: 0, 1, and 2. I need to calculate the lengths of these segments to determine the type of triangle.

**ACTION:**

```
def calculate_length(start, end):
    return math.sqrt((end['x'] - start['x'])**2 + (end['y'] - start['y'])**2)

# Extract the start and end points of the triangle's sides
line_0 = {"start": {"x": -0.395, "y": -0.3723}, "end": {"x": 0.3956, "y": -0.3723}}
line_1 = {"start": {"x": 0.3959, "y": -0.3728}, "end": {"x": 0.0004, "y": 0.4993}}
line_2 = {"start": {"x": 0.0001, "y": 0.5}, "end": {"x": -0.3955, "y": -0.3721}}

# Calculate the lengths of the sides
length_0 = calculate_length(line_0['start'], line_0['end'])
length_1 = calculate_length(line_1['start'], line_1['end'])
length_2 = calculate_length(line_2['start'], line_2['end'])

length_0, length_1, length_2
```

**ENVIRONMENT:** Execution Success

Output:

(0.7906, 0.957590056, 0.9576313656)

**PLAN:** The lengths of the triangle's sides are approximately 0.7906, 0.9576, and 0.9576. Since two sides are equal, the triangle is isosceles.

ANSWER: B) Isosceles, **TERMINATE**

Figure 9. Complete agent trajectories of the CAD-Assistant for CAD Question Answering on the 2D subset of SGPBench.

## 14.2. More qualitative results on CAD question answering for the 3D Subset of SGPBench.

**USER QUERY:** You are given a FreeCAD project file that includes a 3D CAD model. The FreeCAD project is already loaded for you.  
**Question:** What is the shape of the main body of the CAD object?  
 A) Cylinder B) Sphere  
 C) L-shape D) Cube

**PLAN:** To determine the shape of the main body of the CAD object, I need to analyze the 3D model in the FreeCAD project. I will use the 'solid\_recognizer' function to get a visual representation and JSON serialization of the model's attributes. This will help me understand the shape of the object.

**ACTION:**

```
# Use the solid_recognizer to analyze the state of the loaded CAD document
solid_recognizer(doc)
```

**ENVIRONMENT:** Execution Success

Returns primitive parameters in JSON format here.

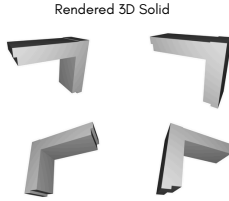

**PLAN:** The rendered image of the 3D model shows an L-shaped object. This matches the description of an L-shape, which is one of the options provided in the multiple-choice question.

**ANSWER:** C, **TERMINATE.**

**USER QUERY:** You are given a FreeCAD project file that includes a 3D CAD model. The FreeCAD project is already loaded for you.  
**Question:** What is the primary shape of the top part of the CAD object?  
 A) Square B) Triangle  
 C) Circle D) Arch

**PLAN:** To answer the question about the primary shape of the top part of the CAD object, I need to examine the 3D CAD model. I will use the 'solid\_recognizer' function to analyze the model and obtain a rendered image of the object. This will help me identify the primary shape of the top part.

**ACTION:**

```
# Use the solid_recognizer to analyze the state of the loaded CAD document
solid_recognizer(doc)
```

**ENVIRONMENT:** Execution Success

Returns primitive parameters in JSON format here.

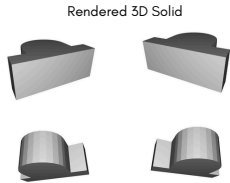

**PLAN:** The rendered image of the 3D model shows that the top part of the CAD object has a curved shape, resembling an arch. The JSON data also indicates the presence of an arc in the sketch geometry, which supports this observation.

**ANSWER:** D) Arch **TERMINATE.**

**USER QUERY:** You are given a FreeCAD project file that includes a 3D CAD model. The FreeCAD project is already loaded for you.

**Question:** How many holes are visible on the flange of the CAD object?  
 A) Two B) Three  
 C) Four D) Five

**PLAN:** To determine the number of holes visible on the flange of the CAD object, I need to analyze the 3D model. I will use the 'solid\_recognizer' function to get a visual rendering and JSON serialization of the CAD model, which will help me identify the number of holes.

**ACTION:**

```
# Use the solid_recognizer to analyze the state of the loaded CAD document
solid_recognizer(doc)
```

**ENVIRONMENT:** Execution Success

Returns primitive parameters in JSON format here.

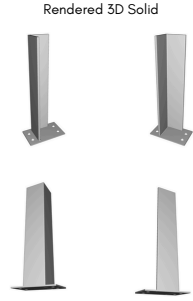

**PLAN:** The JSON data and the rendered image show that there are four circles in the sketches, which likely correspond to holes on the flange. The image confirms the presence of four holes.

**ANSWER:** C, **TERMINATE.**

**USER QUERY:** You are given a FreeCAD project file that includes a 3D CAD model. The FreeCAD project is already loaded for you.

**Question:** What basic geometric shape forms the primary body of the CAD object?  
 A) Cylinder B) Cube  
 C) Sphere D) Pyramid

**PLAN:** To determine the primary geometric shape of the CAD object, I need to analyze the 3D model. I will use the 'solid\_recognizer' function to obtain a rendered image and JSON representation of the CAD model. This will help me identify the basic geometric shape.

**ACTION:**

```
# Use the solid_recognizer to analyze the state of the loaded CAD document
solid_recognizer(doc)
```

**ENVIRONMENT:** Execution Success

Returns primitive parameters in JSON format here.

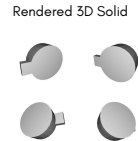

**PLAN:** The rendered image shows a cylindrical shape as the primary body of the CAD object. The JSON data also indicates the presence of arcs and line segments that form circular profiles, which are extruded to create a cylindrical shape.

**ANSWER:** A, **TERMINATE.**

Figure 10. Complete agent trajectories of the CAD-Assistant for CAD Question Answering on the 3D subset of SGPBench.



## 14.3. More qualitative results on CAD sketch autoconstraining.

**USER QUERY:** Analyze the provided sketch to identify geometric relationships and apply the appropriate parametric constraints, ensuring that all elements are properly constrained according to design principles. The 'sketch' object is already loaded for you. Use the Coincident, Parallel, Equal, Vertical, Tangent, Perpendicular and Horizontal constraints.

**PLAN:** To analyze the sketch and apply the appropriate constraints, I will first use the 'sketch\_recognizer' function to understand the current geometries and constraints in the sketch. This will help me identify the geometric relationships and determine which constraints to apply

### ACTION:

```
# Use the sketch_recognizer to analyze the state of the loaded CAD sketch
sketch_recognizer(sketch)
```

**ENVIRONMENT:** Execution Success

Rendered Sketch Image

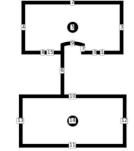

Returns primitive parameters in JSON format here.

**PLAN:** The sketch contains multiple line segments, arcs, and points. To ensure the sketch is fully constrained, I will apply the following constraints: 1. Coincident constraints to connect endpoints of line segments and arcs. 2. Horizontal and vertical constraints for line segments that are aligned with the axes. 3. Parallel constraints for line segments that should remain parallel. 4. Perpendicular constraints for line segments that should be perpendicular. 5. Tangent constraints for arcs and line segments that should be tangent. I will analyze each constraint before applying it to ensure it is valid and does not move the geometries.

### ACTION:

```
# Define constraints to be analyzed and potentially applied
constraints_to_analyze = [
    Sketcher.Constraint('Coincident', 0, SubRef.END.value, 1, SubRef.END.value),
    Sketcher.Constraint('Coincident', 1, SubRef.START.value, 3, SubRef.START.value),
    Sketcher.Constraint('Coincident', 3, SubRef.END.value, 2, SubRef.START.value),
    Sketcher.Constraint('Coincident', 2, SubRef.END.value, 4, SubRef.END.value),
    Sketcher.Constraint('Coincident', 4, SubRef.END.value, 6, SubRef.END.value),
    Sketcher.Constraint('Coincident', 6, SubRef.START.value, 8, SubRef.END.value),
    Sketcher.Constraint('Coincident', 8, SubRef.START.value, 9, SubRef.START.value),
    Sketcher.Constraint('Coincident', 9, SubRef.END.value, 7, SubRef.START.value),
    Sketcher.Constraint('Coincident', 7, SubRef.END.value, 0, SubRef.START.value),
    Sketcher.Constraint('Horizontal', 0),
    Sketcher.Constraint('Horizontal', 1),
    Sketcher.Constraint('Horizontal', 2),
    Sketcher.Constraint('Horizontal', 10),
    Sketcher.Constraint('Horizontal', 11),
    Sketcher.Constraint('Vertical', 3),
    Sketcher.Constraint('Vertical', 4),
    Sketcher.Constraint('Vertical', 6),
    Sketcher.Constraint('Vertical', 7),
    Sketcher.Constraint('Vertical', 12),
    Sketcher.Constraint('Vertical', 13),
    Sketcher.Constraint('Parallel', 0, 1),
    Sketcher.Constraint('Parallel', 2, 10),
    Sketcher.Constraint('Parallel', 3, 12),
    Sketcher.Constraint('Parallel', 4, 13),
    Sketcher.Constraint('Perpendicular', 3, 2),
    Sketcher.Constraint('Perpendicular', 4, 2),
    Sketcher.Constraint('Tangent', 9, 6),
    Sketcher.Constraint('Tangent', 9, 7)
]
```

```
# Analyze and apply constraints
for i, constraint in enumerate(constraints_to_analyze):
    is_valid, moves_geometries = analyse_constraint(sketch, constraint)
    if is_valid and not moves_geometries:
        sketch.addConstraint(constraint)
sketch.recompute()
```

**ENVIRONMENT:** Execution Success

**PLAN:** The constraints have been successfully analyzed and applied without moving the geometries. The sketch should now be fully constrained according to the design principles. The sketch has been analyzed and the appropriate constraints have been applied. The sketch is now fully constrained with coincident, horizontal, vertical, parallel, perpendicular, and tangent constraints. **TERMINATE.**

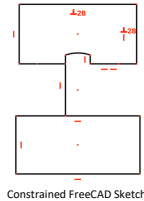

Constrained FreeCAD Sketch

**USER QUERY:** Analyze the provided sketch to identify geometric relationships and apply the appropriate parametric constraints, ensuring that all elements are properly constrained according to design principles. The 'sketch' object is already loaded for you. Use the Coincident, Parallel, Equal, Vertical, Tangent, Perpendicular and Horizontal constraints.

**PLAN:** To analyze the sketch and apply parametric constraints, I will first use the 'sketch\_recognizer' function to understand the current geometries and constraints in the sketch. This will provide a JSON representation and an image rendering of the sketch, which will help in identifying the geometric relationships and determining the necessary constraints.

### ACTION:

```
# Use the sketch_recognizer to analyze the state of the loaded CAD sketch
sketch_recognizer(sketch)
```

**ENVIRONMENT:** Execution Success

Rendered Sketch Image

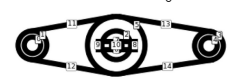

Returns primitive parameters in JSON format here.

**PLAN:** The sketch contains multiple circles and line segments. To ensure proper constraints, I will: 1. Apply Coincident constraints to ensure circles share centers where needed. 2. Apply Parallel constraints to line segments that should be parallel. 3. Apply Equal constraints to circles with the same radius. 4. Apply Vertical and Horizontal constraints to line segments that should be aligned accordingly. 5. Ensure loops are closed with Coincident constraints. I'll start by analyzing and applying Coincident constraints for shared centers and endpoints.

### ACTION:

```
# Coincident constraints for shared centers
coincident_constraints = [
    Sketcher.Constraint('Coincident', 0, SubRef.CENTER.value, 1, SubRef.CENTER.value),
    Sketcher.Constraint('Coincident', 2, SubRef.CENTER.value, 3, SubRef.CENTER.value),
    Sketcher.Constraint('Coincident', 3, SubRef.CENTER.value, 4, SubRef.CENTER.value)
]

# Coincident constraints for endpoints to close loops
coincident_constraints += [
    Sketcher.Constraint('Coincident', 6, SubRef.START.value, 8, SubRef.START.value),
    Sketcher.Constraint('Coincident', 8, SubRef.END.value, 9, SubRef.START.value),
    Sketcher.Constraint('Coincident', 9, SubRef.START.value, 7, SubRef.END.value),
    Sketcher.Constraint('Coincident', 7, SubRef.END.value, 5, SubRef.END.value)
]

# Analyze and apply constraints
for i, constraint in enumerate(coincident_constraints):
    is_valid, moves_geometries = analyse_constraint(sketch, constraint)
    if is_valid and not moves_geometries:
        sketch.addConstraint(constraint)
sketch.recompute()
```

**ENVIRONMENT:** Execution Success

**PLAN:** The Coincident constraints have been successfully applied. Next, I will apply Parallel, Equal, Vertical, and Horizontal constraints. 1. Apply Parallel constraints to line segments that should be parallel. 2. Apply Equal constraints to circles with the same radius. 3. Apply Vertical and Horizontal constraints to line segments that should be aligned accordingly.

### ACTION:

```
# Parallel constraints for line segments
parallel_constraints = [
    Sketcher.Constraint('Parallel', 6, 7),
    Sketcher.Constraint('Parallel', 8, 9)
]

# Equal constraints for circles with the same radius
equal_constraints = [
    Sketcher.Constraint('Equal', 0, 4),
    Sketcher.Constraint('Equal', 1, 2),
    Sketcher.Constraint('Equal', 2, 3)
]

# Vertical and Horizontal constraints
vertical_constraints = [
    Sketcher.Constraint('Vertical', 0),
    Sketcher.Constraint('Vertical', 9)
]

horizontal_constraints = [
    Sketcher.Constraint('Horizontal', 6),
    Sketcher.Constraint('Horizontal', 7)
]

# Analyze and apply constraints
for i, constraint in enumerate(parallel_constraints + equal_constraints + vertical_constraints + horizontal_constraints):
    is_valid, moves_geometries = analyse_constraint(sketch, constraint)
    if is_valid and not moves_geometries:
        sketch.addConstraint(constraint)
sketch.recompute()
```

**ENVIRONMENT:** Execution Success

**PLAN:** The constraints have been successfully applied, and the sketch is now fully constrained according to design principles. The sketch should now have proper geometric relationships and be robust against modifications. **TERMINATE.**

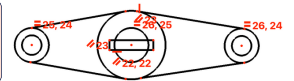

Constrained FreeCAD Sketch

Figure 11. Complete agent trajectories of the CAD-Assistant for CAD sketch autoconstraining



## 14.4. More qualitative results on handdrawn CAD sketch parameterization.

**USER QUERY:** Transform the provided hand-drawn image into a constrained CAD sketch on FreeCAD and add appropriate parametric constraints.

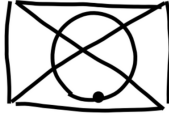

**PLAN:** I need to extract the geometric elements and constraints from the hand-drawn image using the 'sketch\_from\_image' function. Then, I'll analyze each constraint to ensure they are valid and do not move the geometries before applying them to the FreeCAD sketch.

### ACTION:

```
# Use the sketch_from_image function to understand the current geometries in the sketch
sketch_from_image(img)
```

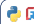

**ENVIRONMENT:** Execution Success

Returns primitive and constraint parameters in JSON format here.

**PLAN:** I need to create a FreeCAD sketch and add the detected geometries. Then, I'll analyze each constraint to ensure they are valid and do not move the geometries before applying them.

### ACTION:

```
# Create a new FreeCAD document and sketch
doc = App.newDocument("HandDrawnSketch")
sketch = doc.addObject("Sketcher::SketchObject", "sketch")

# Add geometries to the sketch
line1 = Part.LineSegment(App.Vector(-0.4922, 0.3516, 0), App.Vector(0.4922, 0.3516, 0))
line2 = Part.LineSegment(App.Vector(-0.4922, -0.3516, 0), App.Vector(0.4922, -0.3516, 0))
line3 = Part.LineSegment(App.Vector(-0.4922, -0.3516, 0), App.Vector(-0.4922, 0.3516, 0))
circle = Part.Circle(App.Vector(0.0078, 0.0078, 0), App.Vector(0, 0, 1), 0.2734)
line4 = Part.LineSegment(App.Vector(-0.4922, -0.3516, 0), App.Vector(0.4922, -0.3516, 0))
line5 = Part.LineSegment(App.Vector(0.4922, -0.3516, 0), App.Vector(0.4922, 0.3516, 0))
line6 = Part.LineSegment(App.Vector(0.4922, -0.3516, 0), App.Vector(-0.4922, 0.3516, 0))

# Add geometries to the sketch
sketch.addGeometry(line1)
sketch.addGeometry(Part.Point(App.Vector(0.0078, -0.2734, 0)))
sketch.addGeometry(line2)
sketch.addGeometry(line3)
sketch.addGeometry(circle)
sketch.addGeometry(line4)
sketch.addGeometry(line5)
sketch.addGeometry(line6)

# Recompute the sketch to update
sketch.recompute()
```

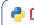

**ENVIRONMENT:** Execution Success

**PLAN:** Now that the geometries are added to the sketch, I need to analyze each constraint to ensure they are valid and do not move the geometries before applying them.

### ACTION:

```
# Analyze and apply constraints
constraints = [
    Sketcher.Constraint('Parallel', 0, 5),
    Sketcher.Constraint('Coincident', 0, SubRef.START.value, 3, SubRef.START.value),
    Sketcher.Constraint('Coincident', 0, SubRef.END.value, 6, SubRef.END.value),
    Sketcher.Constraint('Perpendicular', 3, 5),
    Sketcher.Constraint('Parallel', 5, 6),
    Sketcher.Constraint('Horizontal', 5)
]

for i, constraint in enumerate(constraints):
    is_valid, moves_geometries = analyse_constraint(sketch, constraint)
    if is_valid and not moves_geometries:
        sketch.addConstraint(constraint)
        sketch.recompute()
    else:
        print(f'Constraint [{i}] rejected: It causes unintended geometry movement.')
```

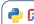

**ENVIRONMENT:** Execution Success

Constraint [1] rejected: It causes unintended geometry movement.

**PLAN:** The constraint that was rejected caused unintended geometry movement. I will proceed with the valid constraints and finalize the sketch. The hand-drawn image has been successfully transformed into a constrained CAD sketch in FreeCAD. The valid constraints were applied without causing unintended geometry movement **TERMINATE**.

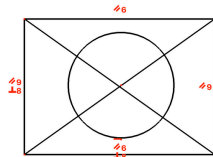

Constrained FreeCAD Sketch

**USER QUERY:** Transform the provided hand-drawn image into a constrained CAD sketch on FreeCAD and add appropriate parametric constraints.

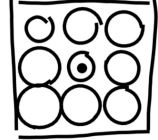

**PLAN:** To transform the hand-drawn image into a constrained CAD sketch, I'll first use the 'sketch\_from\_image' function to extract geometric elements and constraints from the image. Then, I'll analyze each constraint using 'analyse\_constraint' to ensure they are valid and do not move the geometries before applying them.

### ACTION:

```
# Use the sketch_from_image function to understand the current geometries in the sketch
sketch_from_image(img)
```

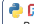

**ENVIRONMENT:** Execution Success

Returns primitive and constraint parameters in JSON format here.

**PLAN:** I have the detected geometries and constraints. Next, I'll create a FreeCAD sketch and add these geometries. Then, I'll analyze each constraint to ensure they are valid and do not move the geometries before applying them.

### ACTION:

```
# Create a new FreeCAD document and sketch
doc = App.newDocument("TransformedSketch")
sketch = doc.addObject("Sketcher::SketchObject", "sketch")

# Add geometries to the sketch
geometries = [
    Part.LineSegment(App.Vector(-0.4922, 0.4922, 0), App.Vector(0.4922, 0.4922, 0)),
    Part.Circle(App.Vector(0.3847, -0.2893, 0), App.Vector(0, 0, 1), 0.1328),
    Part.Point(App.Vector(0.0078, 0.0078, 0)),
    Part.Circle(App.Vector(-0.3283, 0.2893, 0), App.Vector(0, 0, 1), 0.1328),
    Part.Circle(App.Vector(0.0078, 0.0078, 0), App.Vector(0, 0, 1), 0.1328),
    Part.LineSegment(App.Vector(-0.4922, -0.4922, 0), App.Vector(0.4922, -0.4922, 0)),
    Part.Circle(App.Vector(-0.3283, 0.0078, 0), App.Vector(0, 0, 1), 0.1328),
    Part.Circle(App.Vector(-0.3283, 0.0078, 0), App.Vector(0, 0, 1), 0.1328),
    Part.Circle(App.Vector(-0.3283, -0.2893, 0), App.Vector(0, 0, 1), 0.1328),
    Part.LineSegment(App.Vector(-0.4922, -0.4922, 0), App.Vector(0.4922, -0.4922, 0)),
    Part.Circle(App.Vector(0.0078, -0.2893, 0), App.Vector(0, 0, 1), 0.1328),
    Part.LineSegment(App.Vector(0.4922, -0.4922, 0), App.Vector(0.4922, 0.4922, 0)),
    Part.Circle(App.Vector(0.0078, 0.2893, 0), App.Vector(0, 0, 1), 0.1328),
    Part.Circle(App.Vector(0.3283, 0.2893, 0), App.Vector(0, 0, 1), 0.1328)
]

# Add each geometry to the sketch
for geometry in geometries:
    sketch.addGeometry(geometry)

# Recompute the sketch to apply changes
sketch.recompute()

# Analyze and apply constraints
constraints = [
    Sketcher.Constraint('Parallel', 0, 9),
    Sketcher.Constraint('Coincident', 0, SubRef.START.value, 5, SubRef.END.value),
    Sketcher.Constraint('Coincident', 0, SubRef.END.value, 11, SubRef.END.value),
    Sketcher.Constraint('Parallel', 5, 11),
    Sketcher.Constraint('Coincident', 5, SubRef.END.value, 0, SubRef.START.value),
    Sketcher.Constraint('Horizontal', 9),
    Sketcher.Constraint('Perpendicular', 9, 11),
    Sketcher.Constraint('Coincident', 9, SubRef.START.value, 5, SubRef.START.value)
]

# Analyze and apply each constraint
for i, constraint in enumerate(constraints):
    is_valid, moves_geometries = analyse_constraint(sketch, constraint)
    if is_valid and not moves_geometries:
        sketch.addConstraint(constraint)
        sketch.recompute()
    else:
        print(f'Constraint [{i}] rejected: It causes unintended geometry movement.')
```

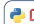

**ENVIRONMENT:** Execution Success

Returns primitive parameters in JSON format here.

Rendered Sketch Image

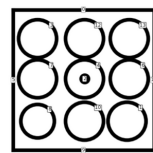

**PLAN:** The sketch has been successfully transformed with the geometries and constraints applied. The constraints were analyzed to ensure they are valid and do not move the geometries. The rendered image confirms the transformation. The hand-drawn image has been successfully transformed into a constrained CAD sketch in FreeCAD. All constraints were validated and applied without moving the geometries **TERMINATE**.

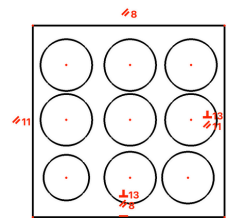

Constrained FreeCAD Sketch

Figure 12. Complete agent trajectories of the CAD-Assistant for handdrawn CAD sketch parameterization.

## 15. Docstrings

This section provides the complete docstring of the toolset available to the VLLM planner.

```
1 def sketch_recognizer(sketch: Sketch) -> None:
2     """Analyzes a 2D CAD sketch, providing both a JSON serialization of the Attributes for the geometry
3     and constraints and an image rendering of the sketch. Use this function to understand the current FreeCAD sketch.
4
5     This function processes the given sketch and returns a JSON representation describing its geometric
6     elements (e.g., lines, arcs, points, circles) and constraints from the 'sketch.Geometry'
7     and 'sketch.Constraints' lists. Attributes for Geometries and constraints are extracted directly from these lists,
8     serialized into a structured JSON format for easy interpretation.
9
10    Additionally, this function generates an image rendering of the sketch for visual examination. The sketch
11    is rendered as a black and white image. Primitives of the CAD sketch are labeled with a unique numerical ID,
12    shown by a marker that is positioned over the primitive.
13
14    Parameters:
15    -----
16    sketch (Sketch):
17        The input sketch object to be analyzed, containing the geometries and constraints.
18
19    Prints:
20    -----
21    Displays the sketch's parameters and constraints for quick review. It also returns a
22    sketch_image (PIL.Image.Image or np.ndarray) rendering of the sketch.
23
24    Usage Example:
25    -----
26    >>> sketch_recognizer(sketch)
27    The sketch contains the following geometries and constraints, serialized in JSON format:
28    {
29        "Geometry": [
30            {
31                "Index": 1,
32                "Type": "Line segment",
33                "StartPoint": {
34                    "x": ...,
35                    "y": ...
36                },
37                "EndPoint": {
38                    "x": ...,
39                    "y": ...
40                },
41                "isConstruction": ...
42            },
43            "Constraints": [
44                { ... }
45            ]
46        ]
47    }
48    Rendered image of the sketch:
49    [Image displays here]
50    """
51
52 def solid_recognizer(doc: App.Document) -> None:
53     """Analyzes a 3D CAD Model, providing both a JSON serialization of the Attributes for the geometry
54     and constraints and an image rendering of the sketch and extrude operations. Use this function to understand the current FreeCAD sketch.
55
56     This function processes the given sketch and returns a JSON representation describing its sketches and extrusions.
57     Attributes for Geometries and constraints are extracted directly from these lists,
58     serialized into a structured JSON format for easy interpretation.
59
60     Additionally, this function generates an image rendering of the 3D CAD model for visual examination. The sketch
61     is with multiple views.
62
63     Parameters:
64     -----
65     doc (App.Document):
66         The FreeCAD document including a list of Objects that can be sketch and extrusion operations
67
68     Prints:
69     -----
70     Displays the sketch and extrusion parameters for quick review. It also returns a
71     cad_image (PIL.Image.Image or np.ndarray) rendering of the sketch.
72
73     Usage Example:
74     -----
75     >>> solid_recognizer(sketch)
76     The 3D CAD model contains the following sketch and extrusion operations, serialized in JSON format:
77     {
78         "Sketch0": {
79             "Geometry": [
80                 {
81                     "Index": 1,
82                     "Type": "Line segment",
83                     "StartPoint": {
84                         "x": ...,
85                         "y": ...
86                     },
87                     "EndPoint": {
88                         "x": ...,
89                         "y": ...
90                     },
91                     "isConstruction": ...
92                 },
93                 "Constraints": [
94                     { ... }
95                 ]
96             },
97             "Extrusion1": { ... }
98         }
99     }
100    Rendered image of the 3D Model:
101    [Image displays here]
102    """
```

```

103
104 def sketch_from_image(img: PIL.Image.Image) -> None:
105     """Extracts a Sketch object from a given sketch image.
106
107     This function processes an input image and detects
108     parametric geometric primitives within the sketch (e.g., lines, circles, arcs, points) and the corresponding constraints. The function handle
109     input images as a PIL image. Detected geometric entities are printed and can be used for further analysis or manipulation.
110
111     Usage:
112     -----
113     This function is called a deep learning network that is imperfect and makes mistakes. Note that predicted constraints might be inaccurate and
114     applying them without analysing them might drastically change the sketch geometry. Use the provided 'analyse_constraint' function to make sure
115     that predicted constraints are valid and do not move geometric entities of the sketch.
116
117     Parameters:
118     -----
119     img (PIL.Image.Image or np.ndarray):
120         The input image of a handdrawn 2D CAD sketch.
121
122     Prints:
123     -----
124     A dictionary in JSON format containing the detected geometries and constraints.
125
126     Usage Example:
127     -----
128     >>> sketch_from_image(img)
129     The handdrawn parametrization tool detected the following sketch geometries and constraints, serialized in JSON format:
130     {
131         "Geometry": [
132             {
133                 "Id": 1,
134                 "Type": "Line segment",
135                 "start_vector": {
136                     "x": ...,
137                     "y": ...
138                 },
139                 "end_vector": {
140                     "x": ...,
141                     "y": ...
142                 },
143             },
144             "Constraints": [
145                 { ... }
146             ]
147         ]
148     }
149     """
150
151 def get_crosssection_image(mesh: o3d.geometry.TriangleMesh, normal: np.ndarray, origin: np.ndarray) -> PIL.Image.Image
152     """
153     Generates a 2D cross-sectional image from a 3D mesh.
154
155     This function takes a 3D mesh and extracts a cross-section based on a specified plane, defined by a normal vector
156     and an origin point. The extracted cross-section is then projected onto a 2D plane and normalized to a fixed size
157     suitable for visualization. The resulting image is centered, cropped, and rescaled to 128x128 pixels, capturing the
158     silhouette of the cross-section.
159
160     Parameters:
161     -----
162     mesh : o3d.geometry.TriangleMesh
163         The 3D mesh from which the cross-section will be extracted. It should contain vertices and faces attributes.
164     normal : np.ndarray, shape (3,)
165         The normal vector defining the orientation of the cross-sectional plane.
166     origin : np.ndarray, shape (3,)
167         A point on the plane to define its position in 3D space.
168
169     Returns:
170     -----
171     img : PIL.Image.Image
172         A grayscale PIL Image object of size 128x128 representing the 2D cross-section of the mesh.
173     """
174
175 def analyse_constraint(sketch: Sketch, constraint: Constraint) -> (bool, bool):
176     """Evaluate the impact of a given constraint on a sketch without applying it,
177     and determine if it causes significant changes to the geometry.
178
179     This function returns two binary flags: one indicating whether the constraint is valid,
180     and another indicating if it would cause geometries to move. Use this function to analyze
181     the effect of constraints on CAD geometries and ensure they behave as intended before
182     adding them to the sketch.
183
184     Parameters:
185     -----
186     sketch (Sketch):
187         The original FreeCAD sketch object containing geometric elements and constraints.
188
189     constraint (Constraint):
190         The constraint to be evaluated.
191
192     Returns:
193     -----
194     (is_valid, moves_geometries): (bool, bool)
195         - 'is_valid': 'True' if the constraint does not introduce conflicts or invalid states;
196           'False' if the constraint is invalid.
197         - 'moves_geometries': 'True' if the constraint causes movement of one or more geometries;
198           'False' if no significant movement occurs.
199
200     Prints:
201     -----
202     Displays a summary of the effect of the constraint on the geometric entities of the Sketch.Geometry list.
203     It also displays the is_valid and moves_geometries binary flags.
204
205     """

```

```

205 Usage:
206 -----
207 Use this function to test constraints before committing them to the sketch.
208 This allows you to detect unintended movements or conflicts early in the design process.
209
210 Example:
211 -----
212 >>> # Add a coincident constraint to align the start of geometry 1 with the end point of geometry 2.
213 >>> coincident_constraint = Sketcher.Constraint('Coincident', *(1, SubRef.START.value, 2, SubRef.END.value))
214
215 # You can analyse the effect the constraint would have on the sketch geometry
216 >>> is_valid, moves_geometries = analyse_constraint(sketch, coincident_constraint) # the function automatically prints an analysis of the constraint.
217 Analysis of Constraint[0] (without applying it to the sketch):
218 Type: Coincident
219 Elements:
220 - First: 1
221 - FirstPos: START
222 - Second: 2
223 - SecondPos: END
224 Movement:
225 Sketch.Geometry[5]:
226 - START moved from: (-0.500, -0.407) to (-0.297, 0.407)
227 Moves Geometries: True
228 IsValid: True
229 >>> is_valid
230 True
231 >>> moves_geometries
232 True
233
234 Note:
235 ----
236 This function does not modify the original sketch. It only provides a preview of the
237 potential impact of the given constraint.
238 """
239
240 class Sketch:
241     """Represents a 2D sketch object in FreeCAD, used for creating and defining geometric shapes,
242     constraints, and profiles that can later be referenced in 3D operations (e.g., extrusion, revolution).
243
244     The Sketch class provides methods to add, modify, and constrain geometric elements such as
245     lines, arcs, circles, and points. Sketches serve as essential building blocks in parametric
246     modeling, allowing users to control the relationships between elements through constraints.
247
248     Attributes:
249     -----
250     Name (str):
251         The name of the sketch object.
252     Geometry (List[Union[LineSegment, ArcOfCircle, Circle, Point]]):
253         A list of geometric elements in the sketch (e.g., lines, arcs, circles, points).
254     Constraints (List[Sketcher.Constraint]):
255         A list of constraints applied to the sketch elements (e.g., coincidence, equality, tangency).
256     ConstraintCount (int):
257         The total number of constraints applied to the sketch.
258     GeometryCount (int):
259         The total number of geometric elements present in the sketch.
260     Placement (Placement):
261         Defines the position and orientation of the sketch in 3D space. This attribute allows
262         the sketch to be moved or rotated within the document, affecting how it will be aligned
263         with other objects in FreeCAD.
264     State (List[str]):
265         A list representing the current status of the sketch. Possible values include:
266         - 'Touched': The sketch has been modified since the last update.
267         - 'Untouched': The sketch has not been modified since its last valid state.
268         - 'Invalid': The sketch contains errors or unsatisfied constraints.
269
270     Usage Example:
271     -----
272     >>> import FreeCAD
273     >>> from FreeCAD import Part, Sketcher
274     >>> doc = FreeCAD.newDocument("ExampleDoc")
275     >>> sketch = doc.addObject('Sketcher::SketchObject', 'sketch')
276
277     Methods:
278     -----
279     addGeometry(self, geometry: Union[LineSegment, ArcOfCircle, Circle, Point]) -> int:
280         This method is used to add a geometric element to the sketch.
281
282         Parameters:
283         -----
284         geometry:
285             a geometric element to be added on the sketch (e.g., lines, arcs, circles, points).
286
287         Returns:
288         -----
289         index (int):
290             The index of the added geometry on the sketch.Geometry list.
291
292     Usage Example:
293     -----
294     >>> line = Part.LineSegment(App.Vector(0.2, 0.3, 0), App.Vector(0.3, 0.2, 0))
295     >>> line_index = sketch.addGeometry(line) # A line is added.
296     >>> sketch.recompute()
297     >>> line = sketch.Geometry[line_index]
298
299     delGeometries(self, identifiers: List[int]) -> None:
300         Deletes one or more geometries from the sketch, based on their indices on the sketch.Geometry list.
301
302         Parameters:
303         -----
304         identifiers (List[int]):
305             A list of zero-based identifiers specifying which geometries to delete from the sketch.
306
307

```

```

307
308     Usage Example:
309     -----
310     >>> sketch.delGeometries([1]) # This will delete the geometry at index 1
311     >>> sketch.recompute()
312
313
314     addConstraint(self, constraint: Sketcher.Constraint) -> int:
315     Adds a constraint to the sketch.
316     Returns the index of the added constraint.
317
318     Parameters:
319     -----
320     constraint (Sketcher.Constraint):
321         a geometric constraint to be added on the sketch.
322
323     Returns:
324     -----
325     index (int):
326         The index of the added constraint on the sketch.Constraints list.
327
328     Usage Example:
329     -----
330     >>> parallel_constraint = Sketcher.Constraint('Parallel', 4, 6)
331     >>> sketch.addConstraint(parallel_constraint)
332     >>> sketch.recompute()
333
334     recompute(self) -> None:
335     Forces a recompute of the sketch to apply and update any pending changes.
336     This ensures that all modifications (such as added or deleted geometries and constraints)
337     are reflected in the document.
338
339     Parameters:
340     -----
341     None
342
343     Returns:
344     -----
345     None
346     """
347
348     class LineSegment:
349         """Represents a line defined by two endpoints in 3D space.
350         This class is part of the FreeCAD Part module and should be instantiated using 'Part.LineSegment'.
351
352         Constructor:
353         -----
354         __init__(self, start_vector: App.Vector, end_vector: App.Vector)
355             Initializes a LineSegment with specified start and end points in 3D space.
356
357         Parameters:
358         -----
359         start_vector (App.Vector):
360             A 3D vector representing the coordinates of the line's start point.
361         end_vector (App.Vector):
362             A 3D vector representing the coordinates of the line's end point.
363
364         Attributes:
365         -----
366         StartPoint (App.Vector):
367             The start point of the line segment.
368         EndPoint (App.Vector):
369             The end point of the line segment.
370
371         Usage Example:
372         -----
373         >>> # Create a LineSegment from start and end points.
374         >>> start_point = App.Vector(0, 0, 0)
375         >>> end_point = App.Vector(1, 1, 1)
376         >>> line = Part.LineSegment(start_point, end_point)
377         >>> line.StartPoint.x
378         0 # access the x coordinate of the start point
379         """
380
381     class Circle:
382         """Represents a circle in 3D space defined by a center point, a normal vector and a radius using FreeCAD's Vector objects.
383         This class is part of the FreeCAD Part module and should be instantiated using 'Part.Circle'.
384
385         Constructor:
386         -----
387         __init__(self, center_vector: App.Vector, normal_vector: App.Vector, radius: float):
388             Initializes a Circle with a specified center, normal vector, and radius.
389
390         Parameters:
391         -----
392         center_vector (App.Vector):
393             A 3D vector with the coordinates of the center point of the circle.
394         normal_vector (App.Vector):
395             A 3D vector representing the direction normal to the circle's plane.
396         radius (float):
397             The radius of the circle.
398
399         Attributes:
400         -----
401         Center : (App.Vector)
402             The center point of the circle.
403         Radius : (float)
404             The radius of the circle.
405
406         Usage Example:
407         -----
408         >>> center = App.Vector(6.0, 3.0, 0)
409         >>> normal = App.Vector(0, 0, 1)

```

```

410 >>> radius = 1.1
411 >>> circle = Part.Circle(center, normal, radius)
412 >>> circle.Center
413 Vector (6.0, 3.0, 0.0)
414 """
415
416 class Point:
417     """Represents a point in 3D space.
418     This class is part of the FreeCAD Part module and should be instantiated using `Part.Point`.
419
420     Constructor:
421     -----
422     __init__(self, point_vector: App.Vector):
423         Constructor of the Point class
424
425     Parameters:
426     -----
427     point_vector (App.Vector):
428         A 3D vector with the coordinates of the point.
429
430     Attributes:
431     -----
432     X (float):
433         The x-coordinate of the point.
434     Y (float):
435         The y-coordinate of the point.
436     Z (float):
437         The z-coordinate of the point.
438
439     Usage Example:
440     -----
441     >>> point = Part.Point(App.Vector(1.0, 2.0, 3.0))
442     >>> point.X
443     1.0
444     """
445
446 class ArcOfCircle:
447     """Represents a circular arc derived from a given circle, defined by start and end angles in radians.
448     The arc is drawn counterclockwise from the start angle to the end angle. Angles are expressed in radians
449     where 0 radians correspond to the positive x-axis and increase counterclockwise.
450
451     This class is part of the FreeCAD Part module and should be instantiated using `Part.ArcOfCircle`.
452
453     Constructor:
454     -----
455     __init__(self, circle: Circle, start_param: float, end_param: float)
456         Initializes an ArcOfCircle instance from a circle and specified start and end parameters.
457
458     Parameters:
459     -----
460     circle (Circle):
461         The Circle object from which the arc is derived.
462     start_param (float):
463         The starting parameter (angle in radians) on the circle's circumference that defines the beginning of the arc.
464     end_param (float):
465         The ending parameter (angle in radians) on the circle's circumference that defines the end of the arc.
466
467     Attributes:
468     -----
469     Radius : (float)
470         The radius of the circle from which the arc is derived.
471     StartPoint : (App.Vector)
472         The start point of the arc.
473     EndPoint : (App.Vector)
474         The end point of the arc.
475     Center : (App.Vector)
476         The center point of the circle from which the arc is derived.
477     FirstParameter : (float)
478         The start angle of the arc in radians.
479     LastParameter : (float)
480         The end angle of the arc in radians.
481
482     Usage Example:
483     -----
484     >>> #Create counterclockwise ArcOfCircle with center, radius, and start and end angles in radians.
485     >>> arc_center = App.Vector(0.0670, -0.0000, 0.0) # Center of the arc
486     >>> arc_radius = 0.0130 # Radius of the arc
487     >>> start_param = -1.6008 # Start parameter in radians
488     >>> end_param = -0.0000 # End parameter in radians
489     >>> arc_direction = App.Vector(0, 0, 1)
490     >>> # Create the arc using Part.ArcOfCircle
491     >>> arc = Part.ArcOfCircle(Part.Circle(arc_center, arc_direction, arc_radius), start_param, end_param)
492     """
493
494 class Arc:
495     """Represents an arc defined by a start point, an end point, and an intermediate point on the arc.
496
497     This class is part of the FreeCAD `Part` module and should be instantiated using `Part.Arc`.
498     The arc is uniquely determined by three points: the start, the end, and a point somewhere
499     on the arc (referred to as the midpoint, though it need not be the geometric middle). The
500     arc lies on the circle that passes through these three points.
501
502     After calling `recompute()` on a FreeCAD sketch, an `Arc` object is automatically
503     transformed into an `ArcOfCircle` object. This is because FreeCAD optimizes the
504     geometry representation for arcs, converting them to arcs of circles after
505     the geometry is fully processed.
506
507     Constructor:
508     -----
509     __init__(self, start_vector: App.Vector, end_vector: App.Vector, mid_vector: App.Vector)
510         Initializes a Arc with specified start, end and mid points in 3D space.
511
512     Parameters:

```

```

514     parameters:
515     -----
516     start_vector (App.Vector):
517         A 3D vector representing the coordinates of the arc's start point.
518     end_vector (App.Vector):
519         A 3D vector representing the coordinates of the arc's end point.
520     mid_vector (App.Vector):
521         A 3D vector representing a point on the circumference of the arc.
522
523     Usage:
524     -----
525     Use this function to create ArcOfCircle objects from start, end and mid points.
526
527     Usage Example:
528     -----
529     >>> start_point = App.Vector(5.0, 0, 0)
530     >>> end_point = App.Vector(0, 5.0, 0)
531     >>> mid_point = App.Vector(3.54, 3.54, 0)
532     >>> arc = Part.Arc(start_point, mid_point, end_point)
533     <Arc object>
534     >>> sketch.addGeometry(arc)
535     >>> sketch.recompute()
536     >>> arc
537     <ArcOfCircle object>
538     """
539
540 class SubRef (Enum):
541     START = 1
542     END = 2
543     CENTER = 3
544
545 class Constraint:
546     """Represents a geometric constraint in a FreeCAD sketch.
547     Constraints define relationships between geometric elements (lines, arcs, circles, points), ensuring specific properties or behaviors.
548     Constraints can be created using the 'Sketch.addConstraint()' method.
549
550     Constructor:
551     -----
552     __init__(self, constraint_type: str, *args)
553         Initializes a Sketcher.Constraint instance with a specified type and parameters.
554
555     Parameters:
556     -----
557     constraint_type (str):
558         The type of constraint to apply. Supported types include:
559         - 'Coincident'
560         - 'Parallel'
561         - 'Equal'
562         - 'Vertical'
563         - 'Horizontal'
564         - 'Perpendicular'
565         - 'Tangent'
566
567     *args (varies):
568         Additional parameters specific to the constraint type. These define the geometries or points
569         to which the constraint applies and any additional constraint-specific requirements.
570
571     Usage:
572     -----
573     Supported Constraint Types and Their Arguments:
574     1. Coincident: Enforces that two points or vertices coincide (i.e., share the same location in space).
575         - args: ('Coincident', First, FirstPos, Second, SecondPos)
576             - First (int):
577                 The index of the first geometry.
578             - FirstPos (int):
579                 The vertex (1 for start, 2 for end, 3 for center) of 'Geometry_index1' to fulfill the constraint.
580             - Second (int):
581                 The index of the second geometry.
582             - SecondPos (int):
583                 The vertex (1 for start, 2 for end, 3 for center) of 'Geometry_index2' to fulfill the constraint.
584
585     2. Parallel: Ensures two lines remain parallel.
586         - args: ('Parallel', First, Second)
587             - First (int):
588                 The index of the first Line segment to be made parallel.
589             - Second (int):
590                 The index of the second Line segment to be made parallel.
591
592     3. Equal: Makes two lines or circles equal in length or radius.
593         - args: ('Equal', First, Second)
594             - First (int):
595                 The index of the first line segment or circle.
596             - Second (int):
597                 The index of the first line segment or circle.
598
599     4. Vertical: Forces a line segment to be vertical.
600         - args: ('Vertical', First)
601             - First (int): The index of the Line segment.
602
603     5. Horizontal: Forces a line segment to be horizontal.
604         - args: ('Horizontal', First)
605             - First : (int)
606                 The index of the line segment.
607
608     6. Perpendicular: Ensures that two line segments are perpendicular.
609         - args: ('Perpendicular', Geometry_index1, Geometry_index2)
610             - Geometry_index1 : (int)
611                 The index of the first line segment.
612             - Geometry_index2 : (int)
613                 The index of the second line segment.
614

```



```

615         7. Tangent: Makes a line tangent to a curve.
616         - args: ('Tangent', Geometry_index1, Geometry_index2)
617         - Geometry_index1 : (int)
618           The index of the first geometry.
619         - Geometry_index2 : (int)
620           The index of the first geometry.
621
622     Usage Example:
623     -----
624     >>> coincident_constraint = Sketcher.Constraint('Coincident', *(1, SubRef.START.value, 2, SubRef.END.value))
625     >>> sketch.addConstraint(coincident_constraint)
626     >>> sketch.recompute()
627     >>> sketch.State
628     ['Touched']
629     # Check the total number of constraints applied to the sketch.
630     >>> print(f"Number of constraints: {len(sketch.Constraints)}")
631     Number of constraints: 2
632     # Remove the most recently added constraint.
633     >>> sketch.delConstraint(len(sketch.Constraints) - 1)
634     # Remove the constraint on specific index.
635     >>> sketch.delConstraint(coincident_constraint_index)
636     >>> sketch.addConstraint(Sketcher.Constraint('Horizontal', 0))
637     >>> sketch.recompute()
638     >>> sketch.State # Use the State Variable to ensure that all added constraints are valid.
639     ['Touched', 'Invalid']
640     """
641
642 class Extrusion:
643     """Represents an extrusion of a sketch in FreeCAD.
644     This class is part of the FreeCAD Part module and should be instantiated using a sketch object and the desired extrusion parameters.
645
646     Attributes:
647     -----
648     Base (Sketch):
649         The sketch object that is extruded into a 3D solid.
650     DirMode (str):
651         Direction mode of the extrusion (default: "Normal").
652     LengthFwd (float):
653         Forward extrusion length.
654     LengthRev (float):
655         Reverse extrusion length.
656     Solid (bool):
657         Whether the extrusion is a solid (default: True).
658     Reversed (bool):
659         Whether the extrusion direction is reversed.
660     Symmetric (bool):
661         Whether the extrusion is symmetric along the sketch plane.
662     TaperAngle (float):
663         Taper angle for the extrusion.
664     TaperAngleRev (float):
665         Reverse taper angle for the extrusion.
666
667     Usage Example:
668     -----
669     >>> extrude = doc.addObject('Part::Extrusion', 'Extrude')
670     >>> extrude.Base = sketch # extrude an existing sketch object
671     >>> extrude.DirMode = "Normal"
672     >>> extrude.DirLink = None
673     >>> extrude.LengthFwd = 10.00
674     >>> extrude.LengthRev = 0.0
675     >>> extrude.Solid = True
676     >>> extrude.Reversed = False
677     >>> extrude.Symmetric = False
678     >>> extrude.TaperAngle = 0.0
679     >>> extrude.TaperAngleRev = 0.0
680     >>> doc.recompute()
681     """
682
683 class Solid:
684     """Represents a 3D solid in FreeCAD, created as part of an 'Extrusion' operation.
685     This shape object holds the geometry of the extruded solid and provides access to various
686     geometric properties, as well as methods for performing transformations and boolean operations
687     with other shapes.
688
689     Attributes:
690     -----
691     TypeId (str):
692         The type of shape, typically "Part::TopoShape".
693     Volume (float):
694         The volume of the extruded solid.
695     Area (float):
696         The total surface area of the extruded solid.
697     BoundBox (BoundingBox):
698         The bounding box of the shape, describing the spatial limits of the extrusion.
699
700     Methods:
701     -----
702     fuse(shape: Shape) -> Shape:
703         Performs a union operation, merging this shape with another solid to create a combined shape.
704
705         Parameters:
706         -----
707         shape (Shape):
708             The other solid shape with which to perform the union operation.
709
710         Returns:
711         -----
712         Shape:
713             A new solid object representing the union of this shape and the specified shape.
714
715     Usage Example:
716     -----
717     >>> shane1 = extrude1.Shape # Access the extruded shape

```

```

717     >>> shape1 = extrude1.Shape # Access the extruded shape
718     >>> shape2 = extrude2.Shape # Access the extruded shape
719     >>> result_shape = shape2.fuse(shape1) # Union with another shape
720
721 cut(shape: Shape) -> Shape:
722     Performs a cut operation, subtracting the specified shape from this shape.
723
724     Parameters:
725     -----
726     shape (Shape):
727         The solid shape to subtract from this shape.
728
729     Returns:
730     -----
731     Shape:
732         A new solid object representing the result of subtracting the specified shape from this shape.
733
734     Usage Example:
735     -----
736     >>> result_shape = shape1.cut(shape2) # Subtract shape2 from shape1
737
738 common(shape: Shape) -> Shape:
739     Performs an intersection operation, keeping only the volume that is common between this shape and another.
740
741     Parameters:
742     -----
743     shape (Shape):
744         The solid shape to intersect with this shape.
745
746     Returns:
747     -----
748     Shape:
749         A new solid object representing the intersected volume of the two shapes.
750
751     Usage Example:
752     -----
753     >>> result_shape = shape1.common(shape2) # Intersect shape1 with shape2
754 """

```
